# Supplementary material for: Nitrile-substituted thienyl and phenyl units as building blocks for high performance n-type polymer semiconductors
Source: Royal Society of Chemistry journal article supplement (doi:10.1039/c5py00804b), 2015-01-01

## Nitrile - Substituted Thienyl and Phenyl Units as Building Blocks for High Performance n - Type Polymer Semiconductors

Yu Xiong, Xiaolan Qiao, and Hongxiang Li \*

### 1. Thermogravimetric Analysis & Differential Scanning Calorimetry

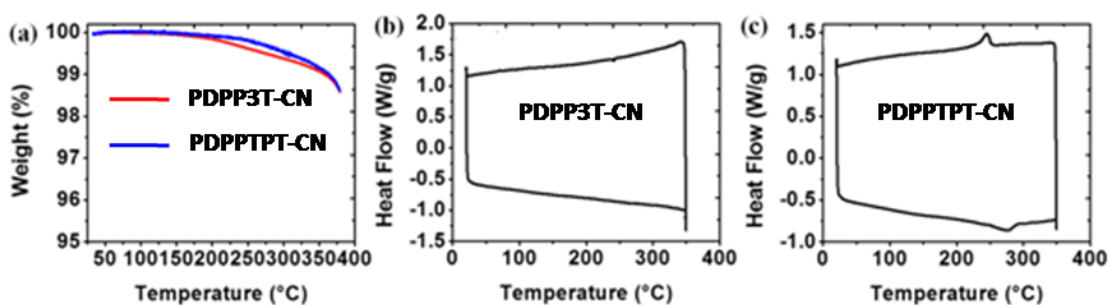

Figure S1. (a) TGA diagram of PDPP3-CN and PDPPTPT-CN; (b-c) DSC diagram of PDPP3-CN and PDPPTPT-CN

### 2. High Temperature Gel Permeation Chromatography (GPC) Diagram of PDPP3-CN and PDPPTPT-CN

|           |              |            |           |
|-----------|--------------|------------|-----------|
| Mp: 64645 | Mn: 23270    | Mv: 52732  | Mw: 58444 |
| Mz: 99641 | Mz+1: 132414 | PD: 2.5116 |           |

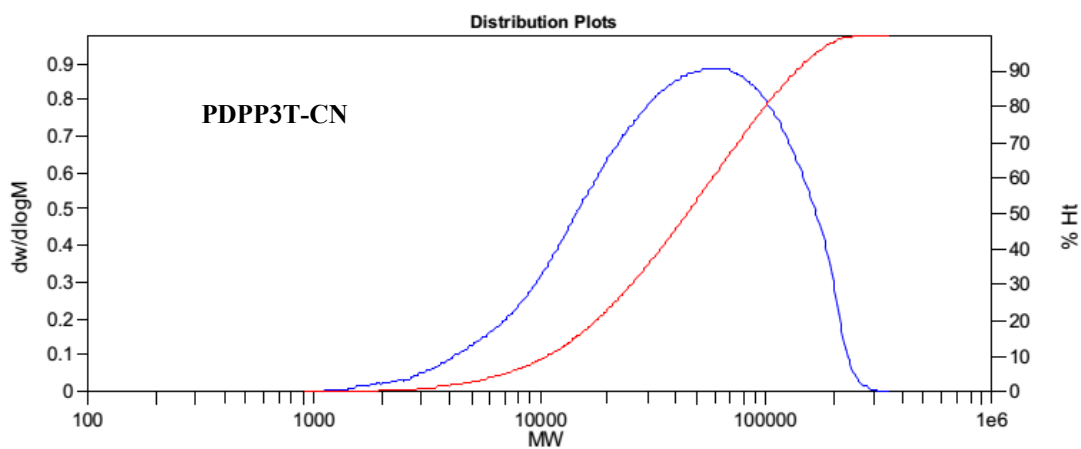

### MW Averages

Mp: 109730

Mn: 67546

Mv: 112894

Mw: 121623

Mz: 182832

Mz+1: 232074

PD: 1.8006

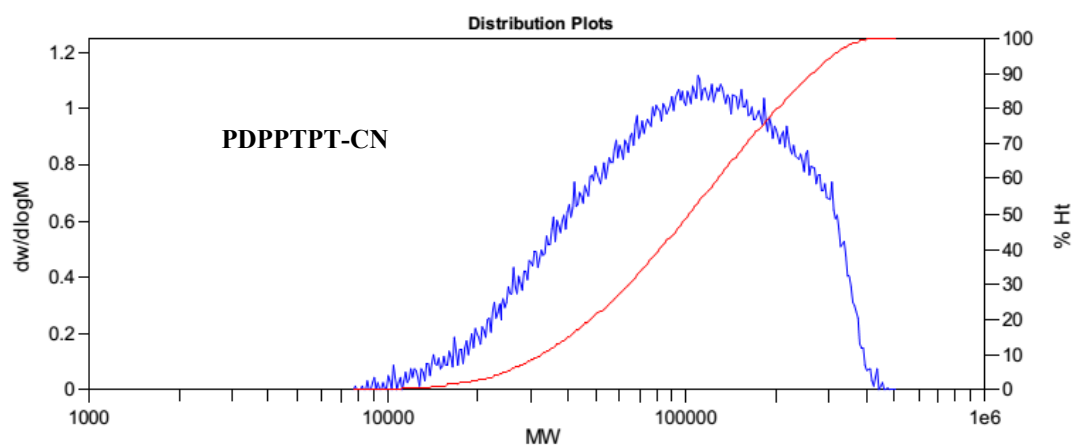

3. AFM images of PDPP3T-CN and PDPPTPT-CN thin films at different thermal annealing temperatures.

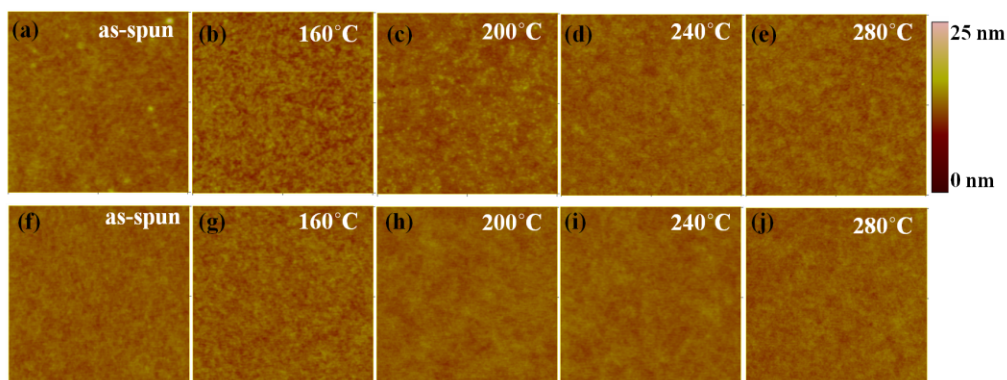

Supplement: c5py00804b1.pdf [file c5py00804b1.pdf]
